# Supplementary material for: Type I Interferon Signaling Is a Common Factor Driving Streptococcus pneumoniae and Influenza A Virus Shedding and Transmission
Source: PubMed Central journal article supplement (PMC8545127; doi:10.1128/mbio.03589-20), 2021-02-16
Supplement: mbio.03589-20-sf001.pdf [file mbio.03589-20-sf001.pdf]

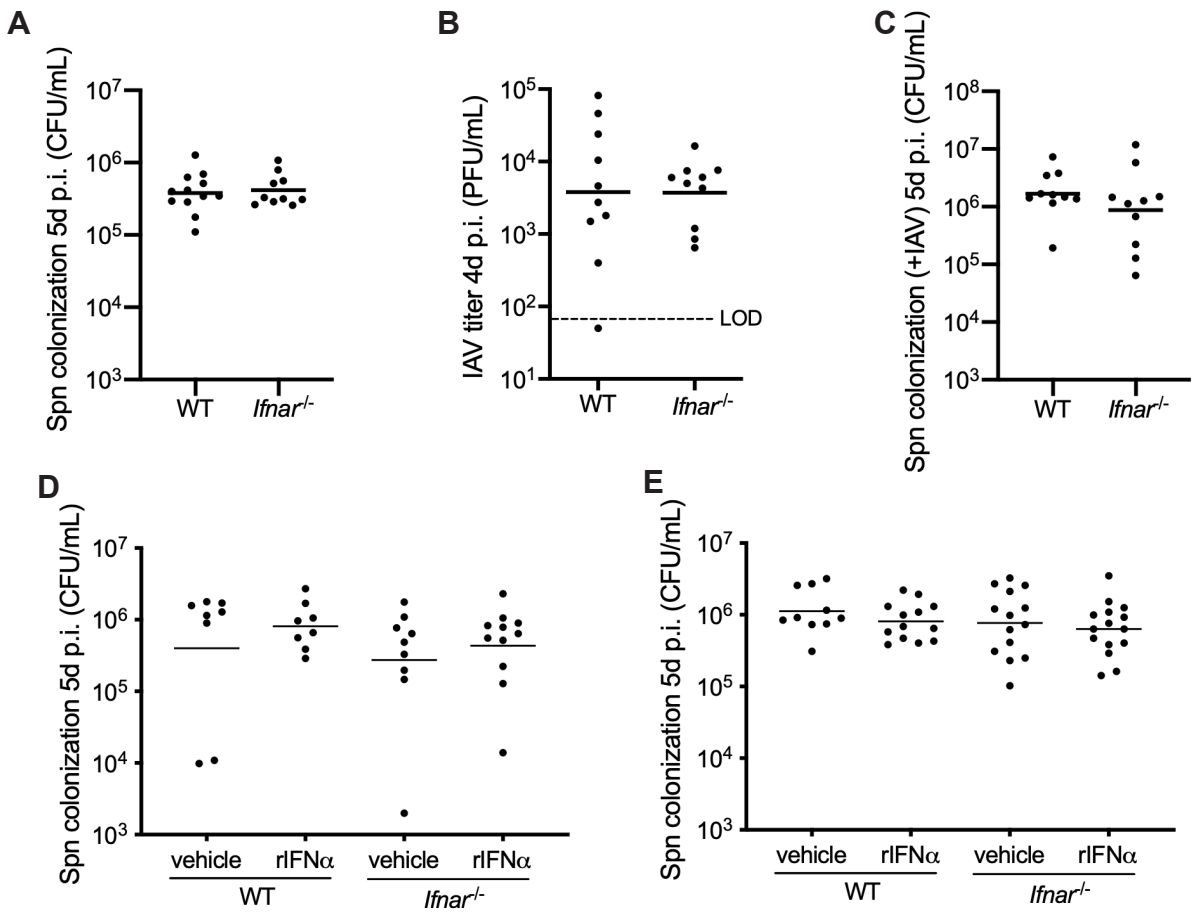

Supplemental Figure 1. Spn colonization and IAV titer does not differ in WT and *Ifnar1*<sup>-/-</sup> pups. Pups were infected IN with either 10<sup>3</sup> CFU Spn or 250 PFU IAV-x31. A) Spn URT colonization was not different between WT and *Ifnar1*<sup>-/-</sup> pups. B) There was no difference in viral titer in the URT of WT and *Ifnar1*<sup>-/-</sup> pups. C) WT and *Ifnar1*<sup>-/-</sup> pups first received IAV and then Spn; bacterial colonization was not different between pups. D and E: WT and *Ifnar1*<sup>-/-</sup> pups were infected IN with 10<sup>3</sup> CFU Spn and daily received 1000 IU of recombinant mouse IFN $\alpha$ 2, or 1000-5000 IU of recombinant mouse IFN $\beta$ , or vehicle control (0.1%BSA-PBS) by IN instillation. Treatment of WT pups with rIFN $\alpha$ 2 (D) or rIFN $\beta$  (E) did not affect bacterial colonization. Colonization and titer data are for individual pups with the line indicating the geometric mean. Each symbol represents the value from an individual pup on a single day. n  $\geq$  8 pups/group. ns, not significant (Mann-Whitney test). Dotted line shows limit of detection.
