# Supplementary material for: Type I Interferon Signaling Is a Common Factor Driving Streptococcus pneumoniae and Influenza A Virus Shedding and Transmission
Source: PubMed Central journal article supplement (PMC8545127; doi:10.1128/mbio.03589-20), 2021-02-16
Supplement: mbio.03589-20-sf002.pdf [file mbio.03589-20-sf002.pdf]

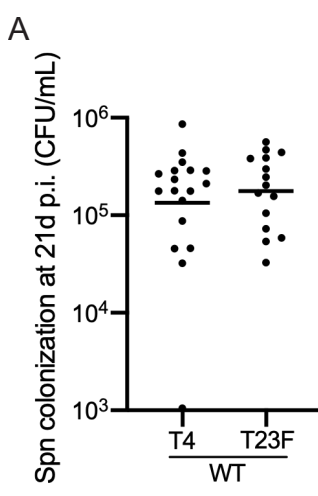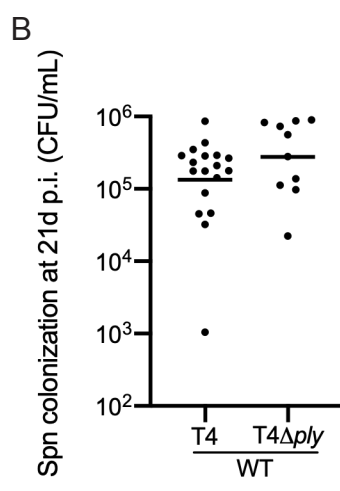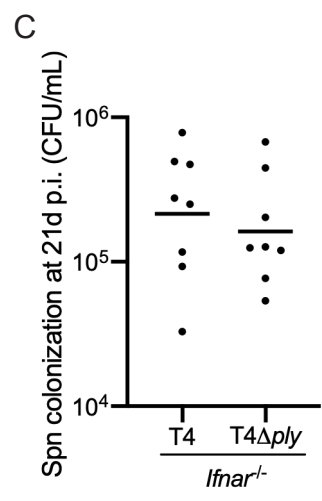

Supplemental Figure 2. Spn T4 and T23F colonization at 21d p.i. does not differ in WT and *Ifnar1*<sup>-/-</sup> mice. A) WT pups were infected IN with 10<sup>3</sup> CFU Spn T4 or T23F or (B and C) WT and *Ifnar1*<sup>-/-</sup> pups were infected IN with 10<sup>3</sup> CFU Spn T4 or an isogenic T4 *ply*<sup>-</sup> mutant; colonization was assessed 21d p.i. A) The mice are still highly-colonized with Spn of both T4 and T23F serotypes. B) Colonization of T4 and the isogenic T4 *ply*<sup>-</sup> mutant is not different. C) At 21d p.i., there is no difference in the colonization between T4 and T4 *ply*<sup>-</sup> strains in *Ifnar1*<sup>-/-</sup> mice. Colonization data are for individual pups with the line indicating the geometric mean. Each symbol represents the value from an individual pup on a single day. n ≥ 8 pups/group. (Not significant, Mann-Whitney test).
