# Supplementary material for: Type I Interferon Signaling Is a Common Factor Driving Streptococcus pneumoniae and Influenza A Virus Shedding and Transmission
Source: PubMed Central journal article supplement (PMC8545127; doi:10.1128/mbio.03589-20), 2021-02-16
Supplement: mbio.03589-20-sf003.pdf [file mbio.03589-20-sf003.pdf]

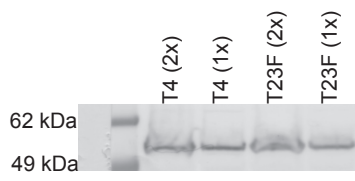

Supplemental Figure 3. Immunoblot of Spn strains for pneumolysin. Spn serotypes T4 and T23F used in this study do not produce different levels of pneumolysin.
