# Supplementary material for: Type I Interferon Signaling Is a Common Factor Driving Streptococcus pneumoniae and Influenza A Virus Shedding and Transmission
Source: PubMed Central journal article supplement (PMC8545127; doi:10.1128/mbio.03589-20), 2021-02-16
Supplement: mbio.03589-20-sf004.pdf [file mbio.03589-20-sf004.pdf]

Supplemental Figure 4. Increased expression of *Ifna* and *Ifnb* was not detected at 48h p.i. in mice that had received Spn. WT pups were infected IN with  $10^3$  CFU Spn T4 or 250 PFU IAV; mock mice received PBS. RNA was isolated from URT lavages 48h p.i. and analyzed by qRT-PCR. Spn-infected mice showed no increased expression of *Ifna* or *Ifnb* over mock mice. This increased expression was seen only in IAV-infected mice. Gene expression data are  $\log_{10}$  transformed; each symbol represents the value from an individual pup. Comparisons (Mann-Whitney test) are to mock mice.  $n \geq 5$  pups/group. ns, not significant; \*\*,  $P < 0.01$ .
